# Supplementary material for: Long non-coding RNA signatures as predictors of prognosis in thyroid cancer: a narrative review
Source: PubMed Central journal article supplement — Ann Transl Med. 2021 Feb;9(4):359. doi: 10.21037/atm-20-8191 (PMC7944284; doi:10.21037/atm-20-8191), 2021-02
Supplement: atm-09-04-359-rc.pdf [file atm-09-04-359-rc.pdf]

## Narrative Review Checklist Long non-coding RNA signatures as predictors of prognosis in thyroid cancer

| Section/Topic             | Item No | Item                                                                                                                                                                                                                                                                                 | Reported on Page Number/Line Number | Reported on Section/Paragraph |
|---------------------------|---------|--------------------------------------------------------------------------------------------------------------------------------------------------------------------------------------------------------------------------------------------------------------------------------------|-------------------------------------|-------------------------------|
| <b>TITLE</b>              |         |                                                                                                                                                                                                                                                                                      |                                     |                               |
| Title                     | 1       | Identify the report as a Narrative Review of lncRNA as predictors of prognosis in thyroid cancer                                                                                                                                                                                     | Page 1/Line 1                       | Title/Paragraph 1             |
| <b>ABSTRACT</b>           |         |                                                                                                                                                                                                                                                                                      |                                     |                               |
| Unstructured summary      | 2       | Provide an unstructured summary including, as applicable: background, objective, brief summary of narrative review and implications for future research, and clinical practice or policy development.                                                                                | Page 2/Line 2-17                    | Abstract/Paragraph 1          |
| <b>INTRODUCTION</b>       |         |                                                                                                                                                                                                                                                                                      |                                     |                               |
| Rationale/background      | 3       | Describe the rationale for the review in the context of what is already known.                                                                                                                                                                                                       | Page 2/Line 25-40                   | Background/Paragraph 1        |
| Objectives                | 4       | Specify the key question(s) identified for the review topic.                                                                                                                                                                                                                         | Page 3/line 30-31                   | Background/Paragraph 1        |
| <b>METHODS</b>            |         |                                                                                                                                                                                                                                                                                      |                                     |                               |
| Research selection        | 5       | Specify the process for identifying the literature search (eg, years considered, language, publication status, study design, and databases of coverage).                                                                                                                             | Page 4/Line 10                      | Methods/Paragraph 2           |
| <b>DISCUSSION/SUMMARY</b> |         |                                                                                                                                                                                                                                                                                      |                                     |                               |
| Narrative                 | 6       | Discuss: 1) research reviewed including fundamental or key findings, 2) limitations and/or quality of research reviewed, and 3) need for future research.                                                                                                                            | Page 16/Line10-17                   | Discussion/Paragraph 2        |
| Summary                   | 7       | Provide an overall interpretation of the narrative review in the context of clinical practice and/or the Nutrition Care Process for registered dietitian nutritionists, clinical practice for other health professionals, policy development and implementation, or future research. | Page 16/Line 31-33                  | Discussion/Paragraph 4        |
